# Supplementary material
Source: PubMed Central journal article supplement (PMC1482552)
Supplement: pnas_0603248103_2.pdf [file pnas_0603248103_2.pdf]

**Table 1. Genotypes of pups resulting from the intercross of *Man2a1*<sup>+/-</sup>*Man2a2*<sup>+/-</sup> females and *Man2a1*<sup>+/-</sup>*Man2a2*<sup>+/-</sup> males**

|                         |     | <i>Man2a1</i> allele |               |            | Total         |
|-------------------------|-----|----------------------|---------------|------------|---------------|
|                         |     | +/+                  | +/-           | -/-        |               |
| <i>Man2a2</i><br>allele | +/+ | 47 (21+26)           | 72 (42+30)    | 32 (15+17) | 151 (78+73)   |
|                         | +/- | 106 (54+52)          | 184 (85+99)   | 65 (38+27) | 355 (177+178) |
|                         | -/- | 41 (19+22)           | 72 (31+41)    | 2 (1+1)    | 115 (51+64)   |
| Total                   |     | 194 (94+100)         | 328 (158+170) | 99 (54+45) | 620 (305+315) |

Genotyping was performed at 3 weeks after birth. Numbers in parentheses represent respective males plus females of each genotype.
